# Supplementary material
Source: publisher figshare collection journal article supplement (https://acs.figshare.com/ndownloader/files/4524892)
Supplement: Supplementary file 1 [file 4524892]

## SUPPLEMENTARY INFORMATION

# MECHANISM OF THE SELECTIVE SULFIDE OXIDATION PROMOTED BY $\text{HNO}_3/\text{FeBr}_3$

*Claudio O. Kinen, Laura I. Rossi\* and Rita H. de Rossi\**

Instituto de Investigaciones en Físico Química de Córdoba (INFIQC), Departamento de  
Química Orgánica, Facultad de Ciencias Químicas, Universidad Nacional de Córdoba,  
Ciudad Universitaria. X5000HUA Córdoba. Argentina

## TABLE OF CONTENTS

- S2 Absorption vs time at  $\lambda=388$  nm for the reaction of **1b** with  $\text{HNO}_3$  (13 %) and  $\text{FeBr}_3$  (5%) at 25 °C.
- S3 Spectrum of triphenylbenzylsulfide in acetonitrile after reaction with  $\text{HNO}_3$  (13 %) and  $\text{FeBr}_3$  (5%) at 25 °C.
- S4 Oxidation of 4-(methylthio)-benzaldehyde **1b** with  $\text{NO}_2(\text{g})$

**Figure S1:** Absorption vs time at  $\lambda=388$  nm for the reaction of **1b** with HNO<sub>3</sub> (13 %) and FeBr<sub>3</sub> (5%) at 25 °C.

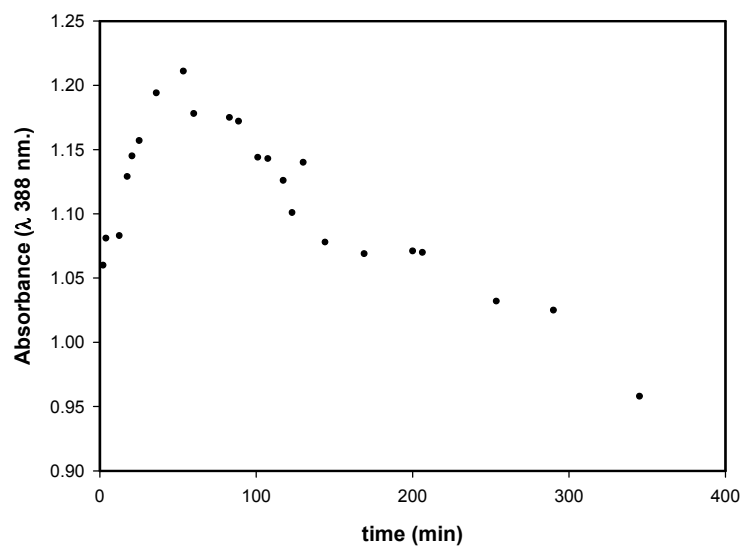

**Figure S2:** Spectrum of triphenylbenzylsulfide in acetonitrile (green line) and the product formed after 5 minutes of reaction in the presence of 5%  $\text{FeBr}_3$  and 13 %  $\text{HNO}_3$  (red line)

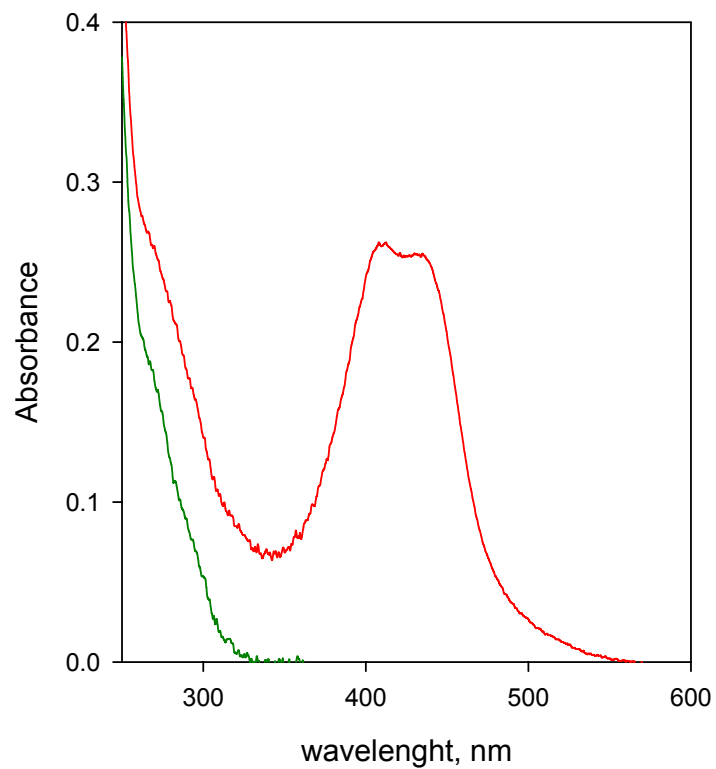

### **Oxidation of 4-(methylsulfanyl)benzaldehyde **1b** with NO<sub>2</sub>(g)**

0.8 mmole of **1b** were dissolved in 1.6 mL of acetonitrile and NO<sub>2</sub> was bubbled through the solution with a stream of N<sub>2</sub>. The NO<sub>2</sub> was generated by dropping concentrated HNO<sub>3</sub> on Cu metal. The solution was checked from time to time until all the substrate disappeared. At this time, the solvent was evaporated and the reaction product analyzed by gas chromatography and NMR. The sulfoxide was the only product formed.
